# Supplementary material
Source: PubMed Central journal article supplement (PMC2863230)
Supplement: supp_M109.083485_jbc.M109.083485-1.pdf [file supp_M109.083485_jbc.M109.083485-1.pdf]

**Table 1S: List of unique peptides identified by tandem mass spectrometry analysis of Rad24p-TAP purification.**

| <b>Proteins</b> | <b>Gene ID</b> | <b>Description</b>                                 | <b>Unique peptides count</b> |
|-----------------|----------------|----------------------------------------------------|------------------------------|
| Atp2p           | SPAC222.12c    | F1-ATPase beta subunit Atp2                        | 19                           |
| Cct1p           | SPBC12D12.03   | chaperonin-containing T-complex alpha subunit Cct1 | 7                            |
| Cct3p           | SPBC1A4.08c    | chaperonin-containing T-complex gamma subunit Cct3 | 10                           |
| Cct8p           | SPBC337.05c    | chaperonin-containing T-complex theta subunit Cct8 | 10                           |
| Cdc15p          | SPAC20G8.05c   | cell division control protein Cdc15                | 12                           |
| Cdc22p          | SPAC1F7.05     | ribonucleoside reductase large subunit Cdc22       | 6                            |
| Cdc25p          | SPAC24H6.05    | serine/threonine protein phosphatase Cdc25         | 6                            |
| Cdc48p          | SPAC1565.08    | SPAC6F12.01 AAA family ATPase Cdc48                | 19                           |
| Chc1p           | SPAC26A3.05    | clathrin heavy chain Chc1                          | 37                           |
| Cip2p           | SPAC12G12.03   | RNA-binding protein Cip2                           | 9                            |
| Dbp2p           | SPBP8B7.16c    | ATP-dependent RNA helicase Dbp2                    | 6                            |
| Dss1p           | SPAC3G6.02     | mRNA export protein Dss1                           | 2                            |
| Ef1a-c          | SPBC839.15c    | translation elongation factor EF-1 alpha Ef1a-c    | 26                           |
| Eft201          | SPAC513.01c    | translation elongation factor 2                    | 40                           |
| Eno101p         | SPBC1815.01    | enolase                                            | 25                           |
| Fas1p*          | SPAC926.09c    | fatty acid synthase beta subunit Fas1              | 96                           |
| Fas2p*          | SPAC4A8.11c    | fatty acid synthase alpha subunit Lsd1             | 97                           |
| Hsp90p          | SPAC926.04c    | Hsp90 chaperone                                    | 30                           |
| Htb1p           | SPCC622.09     | histone H2B alpha Htb1                             | 3                            |
| Mei2p           | SPAC27D7.03c   | RNA-binding protein involved in meiosis Mei2       | 20                           |
| Mts2p           | SPBC4.07c      | 19S proteasome regulatory subunit Rpt2             | 5                            |
| Mts4p           | SPBP19A11.03c  | 19S proteasome regulatory subunit Mts4             | 13                           |
| Nap1p           | SPCC364.06     | nucleosome assembly protein Nap1                   | 10                           |
| Nap2p           | SPBC2D10.11c   | nucleosome assembly protein Nap2                   | 5                            |
| Pabp            | SPAC57A7.04c   | mRNA export shuttling protein                      | 9                            |
| Pgk1p           | SPBC14F5.04c   | phosphoglycerate kinase Pgk1                       | 37                           |
| Pyk1p           | SPAC4H3.10c    | pyruvate kinase                                    | 32                           |
| Rad22p          | SPAC30D11.10   | DNA recombination protein Rad22                    | 14                           |
| Rad24p          | SPAC8E11.02c   | 14-3-3 protein Rad24                               | 39                           |
| Rad25p          | SPAC17A2.13c   | 14-3-3 protein Rad25                               | 31                           |
| Rae1p           | SPBC16A3.05c   | RNA export factor Rae1                             | 19                           |
| Rhp51p          | SPAC644.14c    | recombinase Rhp51                                  | 15                           |
| Rox3p           | SPCC1450.05c   | mediator complex subunit Med19/Rox3                | 2                            |
| Rpl101          | SPCC1183.08c   | 60S ribosomal protein L10a                         | 9                            |
| Rpl14           | SPAC1805.13    | 60S ribosomal protein L14                          | 8                            |
| Rpl2001         | SPAC3A12.10    | 60S ribosomal protein L20a                         | 10                           |
| Rpl2702         | SPCC74.05      | 60S ribosomal protein L27                          | 4                            |
| Rpl302          | SPAPB8E5.06c   | 60S ribosomal protein L3                           | 13                           |
| Rpl35           | SPCC613.05c    | 60S ribosomal protein L35                          | 5                            |
| Rpl402          | SPBP8B7.03c    | 60S ribosomal protein L2                           | 11                           |
| Rpl44           | SPAC1687.06c   | 60S ribosomal protein L28/L44                      | 4                            |
| Rpl701          | SPBC18H10.12c  | 60S ribosomal protein L7                           | 9                            |
| Rpl702          | SPAC3H5.07     | 60S ribosomal protein L7                           | 7                            |
| Rpn5p           | SPAC1420.03    | 19S proteasome regulatory subunit Rpn501           | 9                            |
| Rpn6p           | SPAC23G3.11    | 19S proteasome regulatory subunit Rpn6             | 6                            |

|              |               |                                                  |    |
|--------------|---------------|--------------------------------------------------|----|
| Rps101       | SPAC13G6.02c  | 40S ribosomal protein S3a                        | 6  |
| Rps1702      | SPCC24B10.09  | 40S ribosomal protein S17                        | 7  |
| Rps601       | SPAC13G6.07c  | 40S ribosomal protein S6                         | 5  |
| Sce3p        | SPBC18H10.04c | RNA binding protein                              | 10 |
| SPAC1006.07  | SPAC1006.07   | translation initiation factor eIF4A              | 16 |
| SPAC25G10.08 | SPAC25G10.08  | translation initiation factor eIF3b              | 10 |
| SPAC29A4.02c | SPAC29A4.02c  | translation elongation factor EF-1 gamma subunit | 17 |
| SPAC458.02c  | SPAC458.02c   | mRNP complex                                     | 8  |
| SPAC694.02   | SPAC694.02    | DEAD/DEAH box helicase                           | 6  |
| SPBC354.10   | SPBC354.10    | RNAPII degradation factor                        | 8  |
| SPCC1183.07  | SPCC1183.07   | U3 snoRNP-associated protein Rrp5                | 12 |
| Srp2p        | SPAC16.02c    | mRNA export factor Srp2                          | 5  |
| Ssa1p        | SPAC13G7.02c  | heat shock protein Ssa1                          | 32 |
| Ssa2p        | SPCC1739.13   | heat shock protein Ssa2                          | 53 |
| Ste13p       | SPBC776.09    | ATP-dependent RNA helicase Ste13                 | 8  |
| Sum3p        | SPCC1795.11   | ATP-dependent RNA helicase Sum3                  | 7  |
| Tef3p        | SPCC417.08    | translation elongation factor eEF3               | 42 |
| Tif213       | SPBC17G9.09   | translation initiation factor eIF2 gamma subunit | 4  |
| Tif32*       | SPBC17D11.05  | translation initiation factor eIF3a              | 11 |
| Tif471       | SPAC17C9.03   | translation initiation factor eIF4G              | 9  |
| Tif51        | SPAC26H5.10c  | translation initiation factor eIF5A              | 6  |

---

\* The proteins were most typical contaminants (51)
