# Supplementary material
Source: PubMed Central journal article supplement (PMC2863230)

FIGURE 1S - Suppl

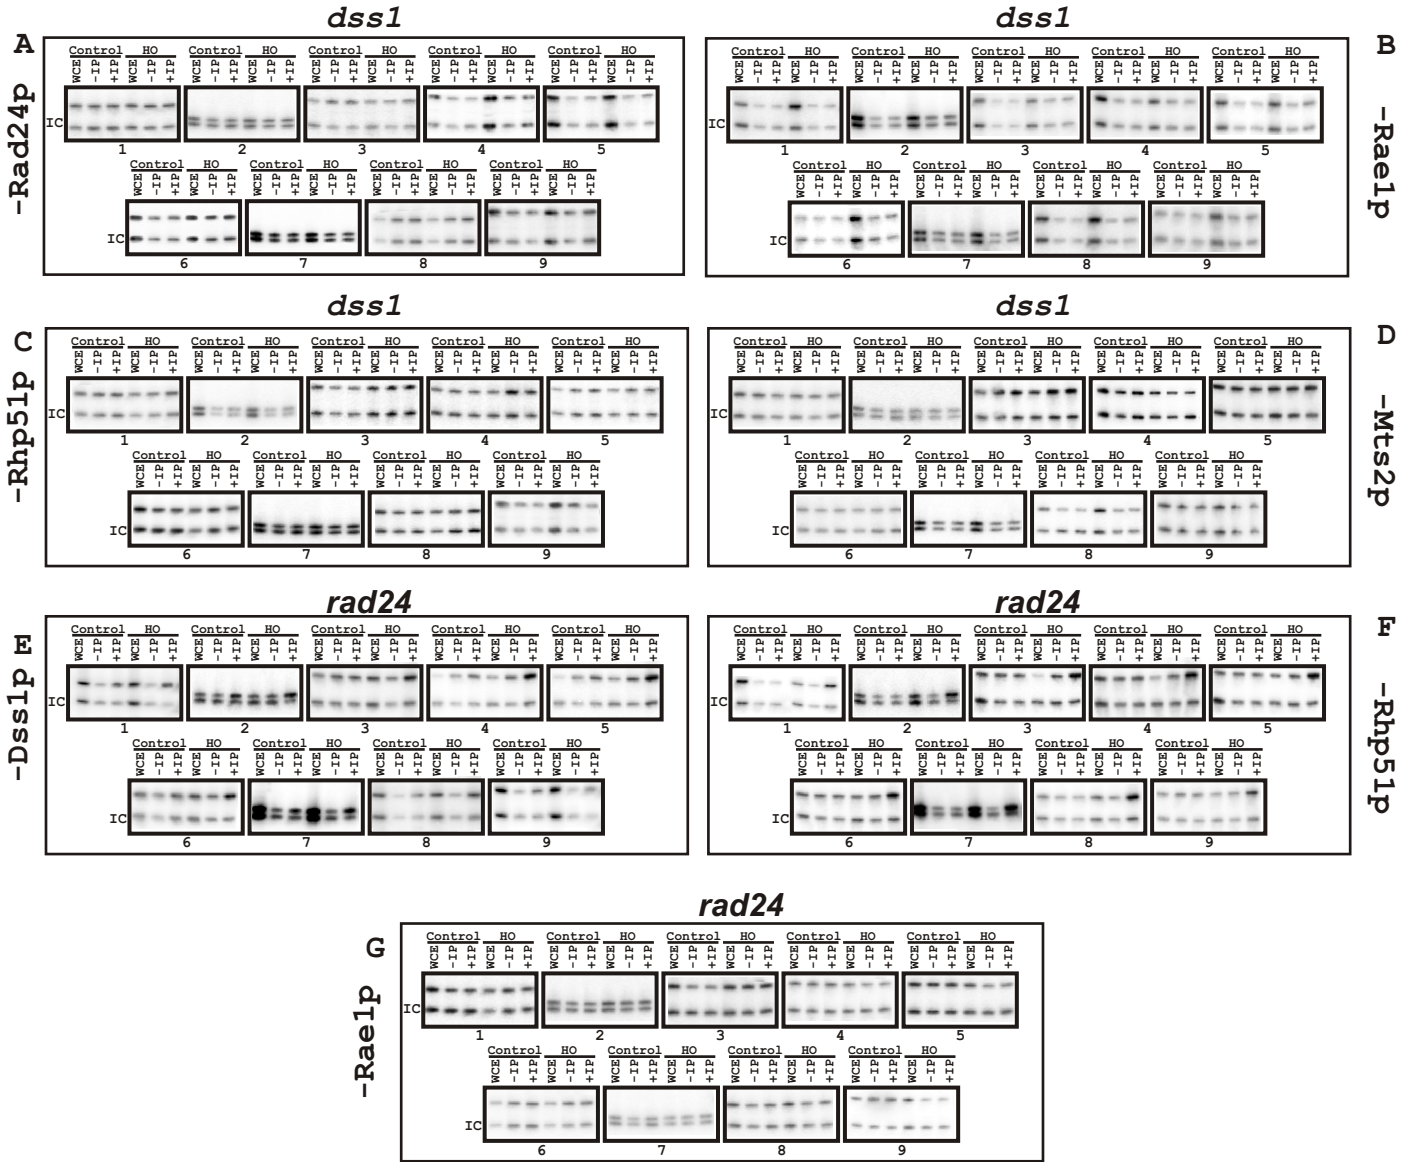

Supplement: supp_M109.083485_jbc.M109.083485-2.pdf [file supp_M109.083485_jbc.M109.083485-2.pdf]
